# Supplementary material for: Integration of a copper-based metal–organic framework with an ionic liquid for electrochemically discriminating cysteine enantiomers
Source: Royal Society of Chemistry journal article supplement (doi:10.1039/d3an00793f), 2023-01-01
Supplement: d3an00793f1.pdf [file d3an00793f1.pdf]

## Electronic Supplementary Information

### **Integration of copper-based metal-organic framework with ionic liquid for electrochemically discriminating cysteine enantiomers**

Qian-xiu Pan,<sup>a</sup> Chen-yu Zhu,<sup>b</sup> Jie Dong,<sup>a</sup> Baogang Zhang,<sup>\*a</sup> Lin Cui,<sup>\*b</sup> Chun-yang Zhang<sup>\*c</sup>

<sup>a</sup> College of Pharmacy, Department of Pathology, Weifang Medical University, Weifang 261053, China

<sup>b</sup> College of Chemistry, Chemical Engineering and Materials Science, Shandong Normal University, Jinan 250014, China.

<sup>c</sup> School of Chemistry and Chemical Engineering, Southeast University, Nanjing 211189, China.

Email: Zhangbg@wfmc.edu.cn (B. Zhang); zpbzcl@126.com (L. Cui); zhangcy@seu.edu.cn (C.Y. Zhang).

### 3.1 Morphological characterization of Cu-MOF

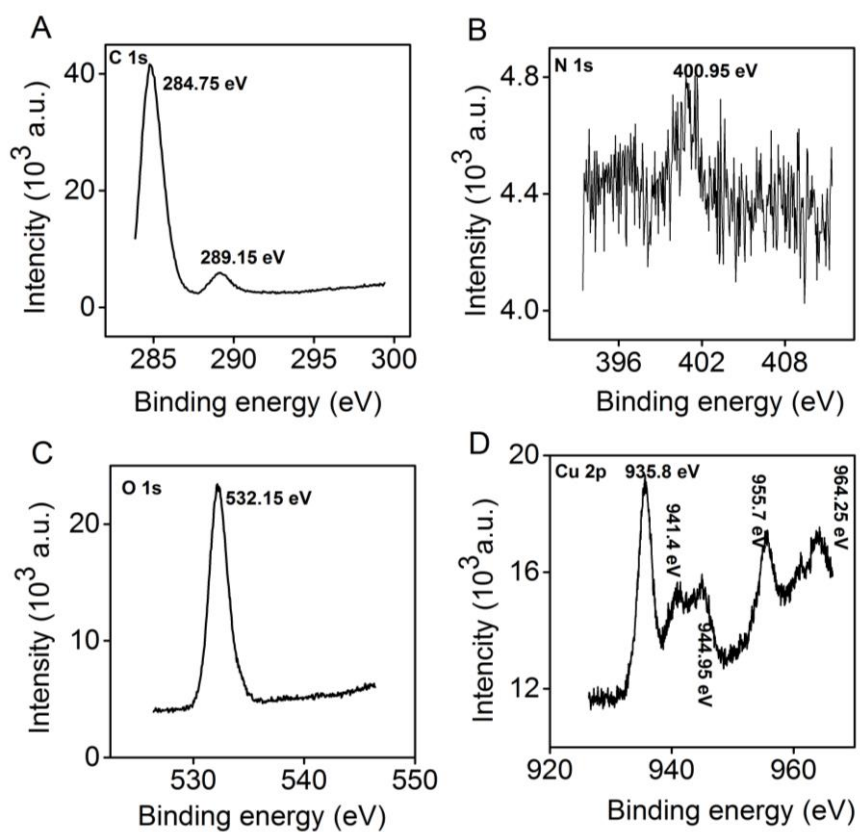

**Fig. S1** XPS diagram of C 1s (A), N 1s (B), O 1s (C) and Cu 2p (D) in the Cu-MOF.

### 3.2 Optimization of experimental conditions

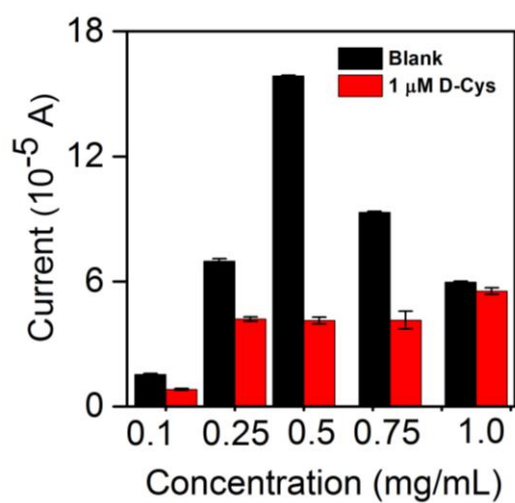

**Fig. S2** Effect of the Cu-MOF concentration upon the cathode peak current of the Cu-MOF/GCE in PBS + ionic liquid without D-Cys (black column) and with  $1 \mu\text{M}$  D-Cys (red column), respectively.

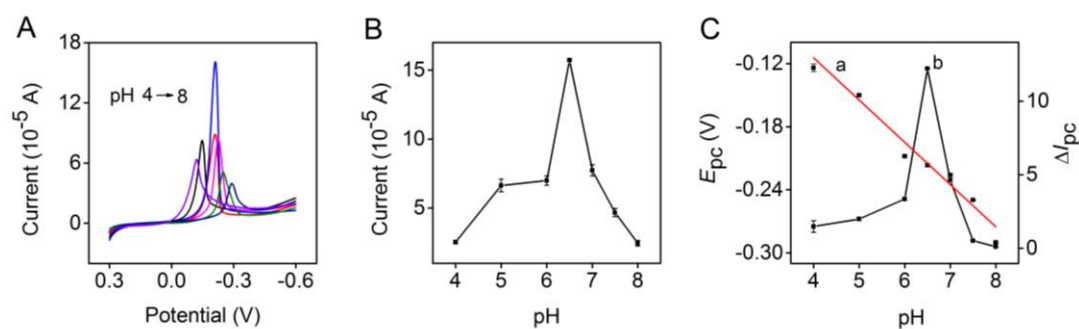

**Fig. S3** (A) Cyclic voltammograms of the Cu-MOF/GCE in PBS in response to different pH: 4.0, 5.0, 6, 6.5, 7, 7.5 and 8.0. (B) Effect of pH upon the cathode peak current of the Cu-MOF/GCE in PBS. (C) Effect of pH upon (a) the cathode peak potential ( $E_{pc}$ ) and (b) change of cathode peak current of the Cu-MOF/GCE without D-Cys ( $I_{blank}$ ) and with D-Cys ( $I_{D-Cys}$ ) in response to different pH.  $\Delta I_{pc} = I_{blank} - I_{D-Cys}$ .

We optimized the experimental conditions including the concentration of Cu-MOF and the pH of solution. As shown in Fig. S2, the change of peak current ( $I_{Blank} - I_{D-Cys}$ ) enhances with the increasing concentration of the Cu-MOF from 0.1 to 0.5 mg/mL, followed by the decrease beyond the concentration of 0.5 mg/mL. This can be explained by that the low amounts of Cu-MOF cannot provide enough copper ions to participate the redox reaction when the concentration of Cu-MOF is less than 0.5 mg/mL, but the excess Cu-MOF may induce large resistance to prevent the electron transport, resulting in the decrease of peak current. Thus, 0.5 mg/mL Cu-MOF is used in subsequent researches.

We further investigated the influence of pH upon the cathode peak current ( $I_{pc}$ ) and cathode peak potential ( $E_{pc}$ ) of the Cu-MOF/GCE (Fig. S3), and examined the variance of cyclic voltammograms of Cu-MOF/GCE in PBS in response to different pH (Fig. S3A). The cathode peak current of  $Cu^{2+}$  enhances with pH from 4.0 to 6.5, followed by the decrease beyond the pH of

6.5 (Fig. S3B) due to the structural damage of the Cu-MOF induced by alkaline solution. Thus, pH 6.5 is used in subsequent researches. The isoelectric point of cysteine is 5.05, and thus D-Cys presents a basic state at the buffer pH value of 6.5. As a result, the -COOH of D-Cys will lose its proton to form -COO<sup>-</sup>, which can electrostatic interaction with Cu-MOF. The cathode peak potential ( $E_{pc}$ ) migrates to the negative direction with the increasing pH, with a linear equation of  $E_{pc} = -0.0402 \text{ pH} + 0.0465$  ( $R^2 = 0.9436$ ) (Fig. S3C, curve a). The electrochemical signal of Cu-MOF is affected by pH, suggesting that the proton is directly involved in the electrochemical redox process of the Cu-MOF.

### 3.3. Effect of scan rate upon the electrochemical signal

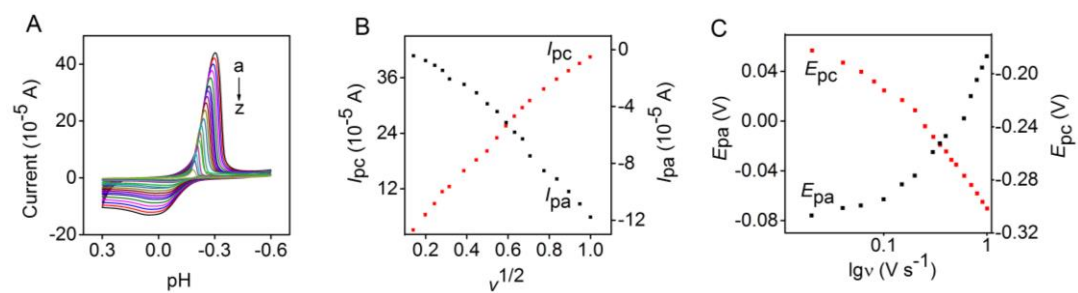

**Fig. S4.** (A) Cyclic voltammograms of Cu-MOF/GCE in 0.1 M PBS with ionic liquid at different scan rates from (a) to (z): 0.02, 0.04, 0.06, 0.08, 0.10, 0.15, 0.20, 0.25, 0.30, 0.35, 0.40, 0.45, 0.50, 0.60, 0.70, 0.80, 0.90, and 1.0 V/s. (B) Relationship of anode ( $I_{pa}$ , black spot) and cathode peak current ( $I_{pc}$ , red spot) versus the square root of scan rate. (C) Relationship of anode ( $E_{pa}$ , black spot) and cathode ( $E_{pc}$ , red spot) peak potential versus the logarithm value of scan rate.
